# Supplementary material for: Fire activity in the northern Arctic tundra now exceeds late Holocene levels, driven by increasing dryness and shrub expansion
Source: Copernicus journal article supplement (doi:10.5194/bg-22-6651-2025), 2025-11-10
Supplement: Supplementary file [file bg-22-6651-2025-supplement-title-page.pdf › bg-22-6651-2025-supplement-title-page.pdf]

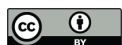

*Supplement of*

**Fire activity in the northern Arctic tundra now exceeds late Holocene levels, driven by increasing dryness and shrub expansion**

**Angelica Feurdean et al.**

*Correspondence to:* Angelica Feurdean (feurdean@em.uni-frankfurt.de) and Mariusz Gałka (mariusz.galka@biol.uni.lodz.pl)

- bg-22-6651-2025-supplement-title-page.pdf
- Supplement\_S1\_22062025.xlsx

The copyright of individual parts of the supplement might differ from the article licence.
